# Supplementary material for: Facile synthesis of highly thermally stable nanoporous γ-aluminas from aluminum alkoxide precursors
Source: Royal Society of Chemistry journal article supplement (doi:10.1039/c5ra05883j), 2015-01-01
Supplement: c5ra05883j1.pdf [file c5ra05883j1.pdf]

## Supplementary materials

### Facile synthesis of highly thermally stable nanoporous $\gamma$ -aluminas from aluminum alkoxides precursors

Gholamhossein Mohammadnezhad\*, Oluseun Akintola, Winfried Plass, Felix H. Schacher, Frank Steiniger<sup>d</sup>,

Martin Westermann

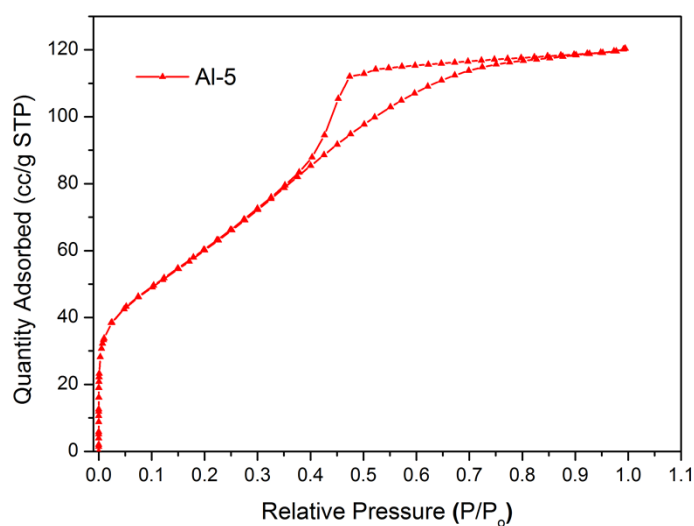

Figure S1. Nitrogen adsorption-desorption isotherm of Al-5 calcined at 400 °C.

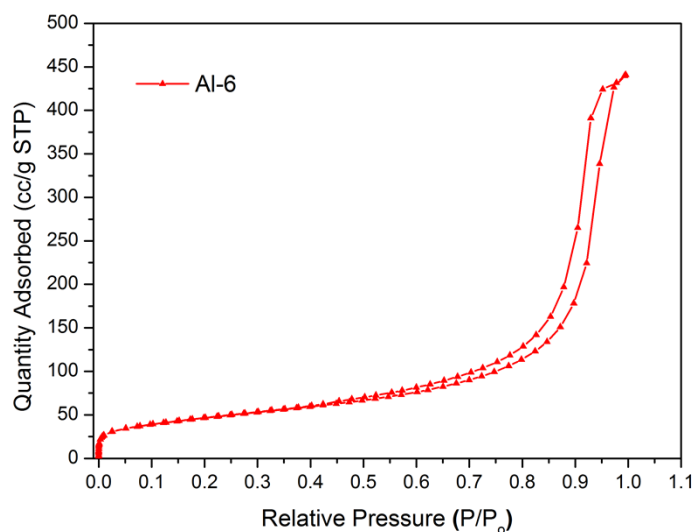

Figure S2. Nitrogen adsorption-desorption isotherm of Al-6 calcined at 400 °C.
